# Supplementary material for: A fully printed ultrafast Si/WS2 quantum dot photodetector with very high responsivity over the UV to near-infrared region
Source: Royal Society of Chemistry journal article supplement (doi:10.1039/d3nr02331a), 2023-01-01
Supplement: d3nr02331a1.pdf [file d3nr02331a1.pdf]

## Supporting Information

### A fully printed ultrafast Si/WS<sub>2</sub> quantum dot photodetector with very high responsivity over the UV to near-infrared region

Subhankar Debnath<sup>1</sup>, Koushik Ghosh<sup>1</sup>, M. Meyyappan<sup>2</sup>, and P. K. Giri<sup>1,2,\*</sup>

<sup>1</sup>Department of Physics, Indian Institute of Technology Guwahati, Guwahati 781039, India

<sup>2</sup>Centre for Nanotechnology, Indian Institute of Technology Guwahati, Guwahati 781039, India

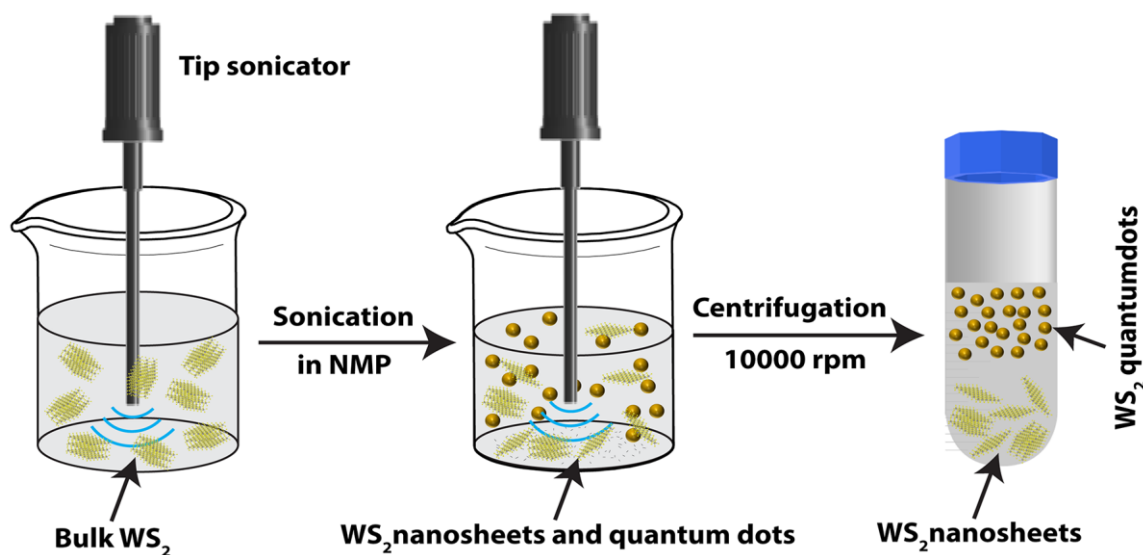

**Figure S1.** Schematic diagram showing the preparation of WS<sub>2</sub> quantum dots.

---

\* Corresponding author; email: [giri@iitg.ac.in](mailto:giri@iitg.ac.in)

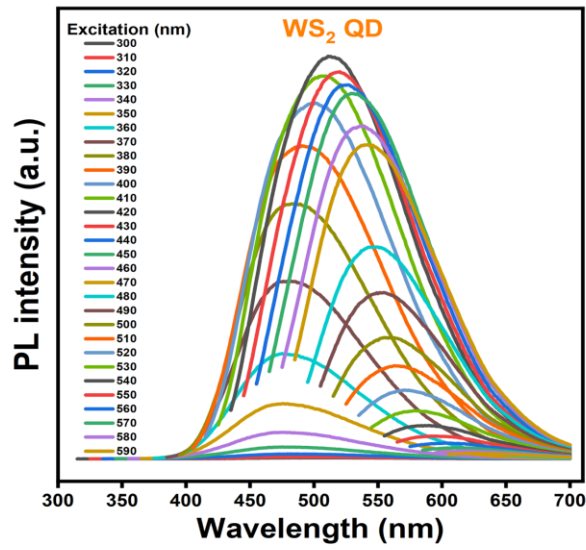

(a)

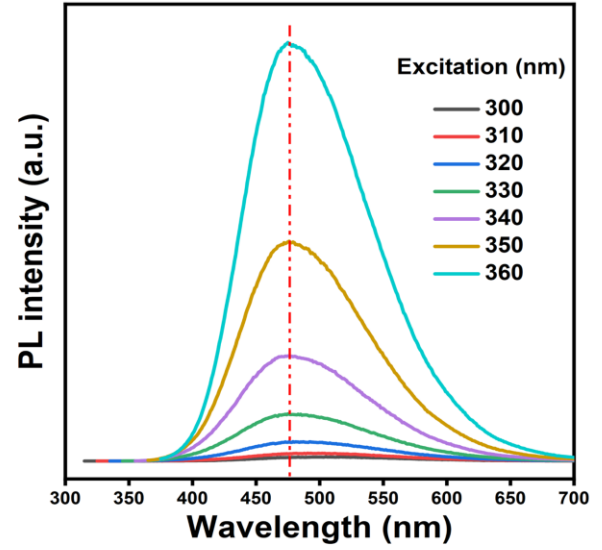

(b)

**Figure S2:** (a) PL spectra of WS<sub>2</sub> QDs at different excitation wavelengths. (b) Excitation dependent PL spectra for selective low wavelegths showing no spectral shift.

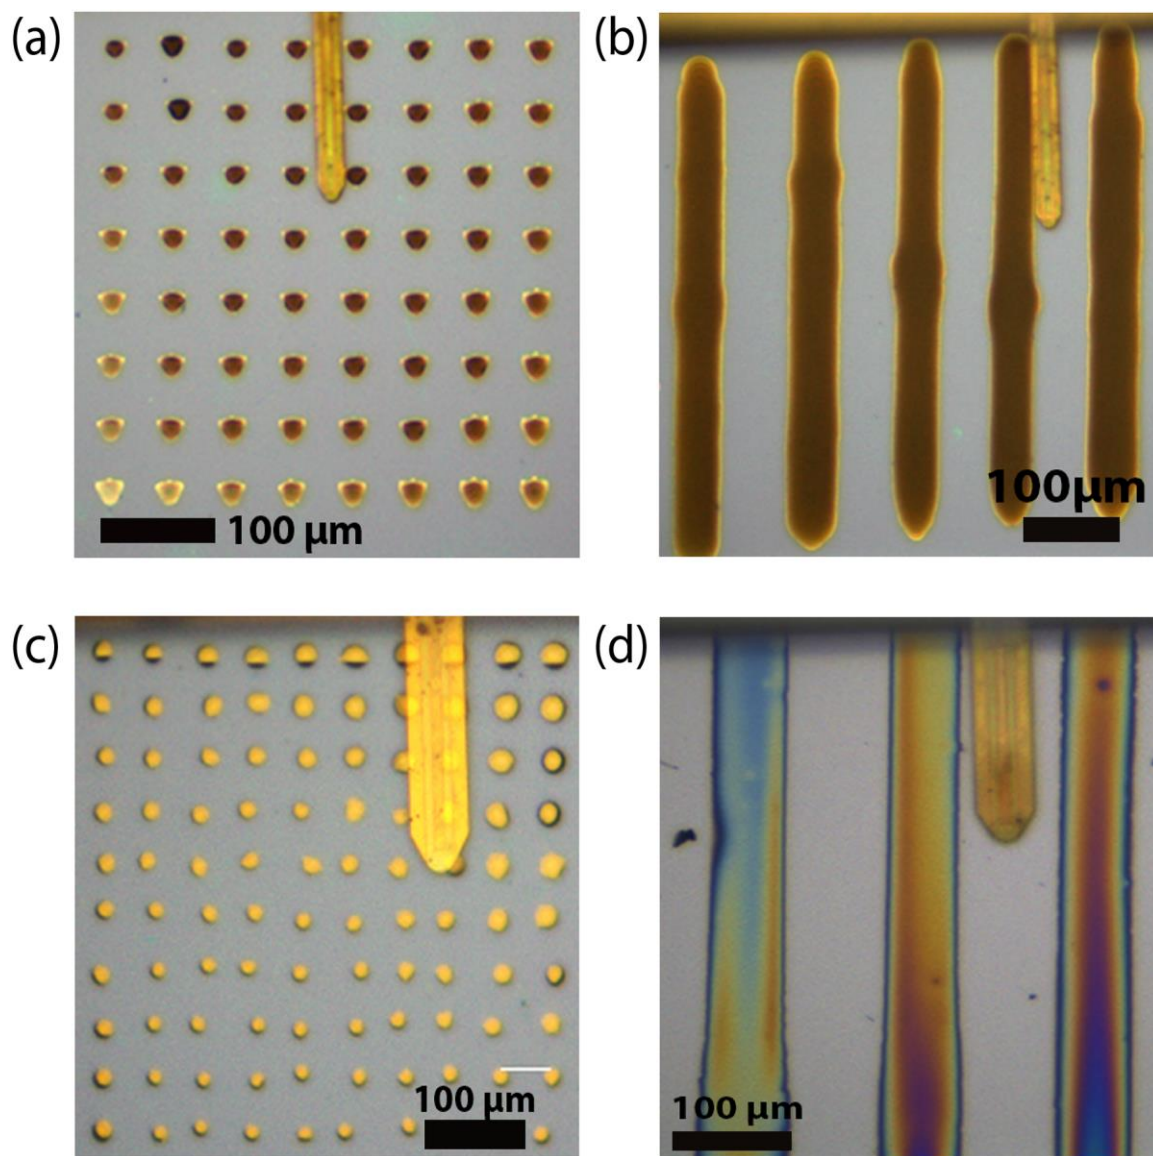

**Figure S3.** Microscopic image of printed test patterns. (a, b) Printed patterns of Ag NP ink. (c, d) Printed patterns of WS<sub>2</sub> QD ink.

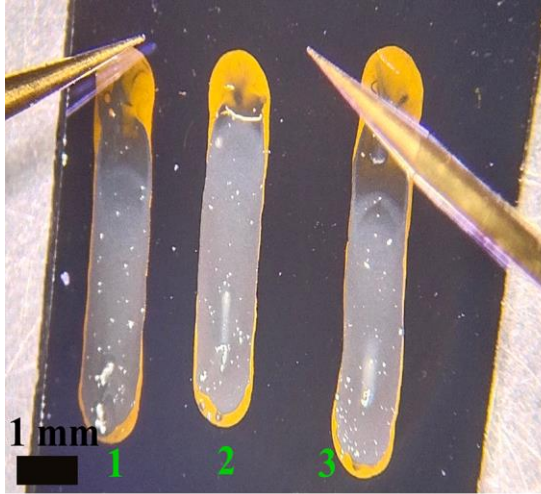

(a)

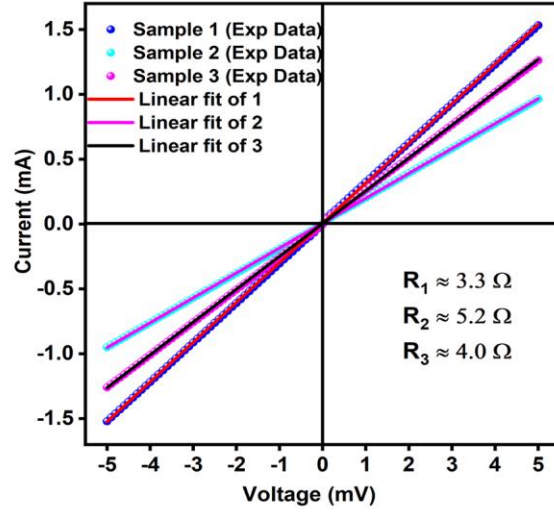

(b)

**Figure S4.** (a) Microscopic image of printed silver lines. (b) I-V characteristics of different samples.

**Table S1.** Summary of the resistivity data of the printed silver lines.

| Sample number | Resistance ( $\Omega$ ) | Length (mm) | Width ( $\mu\text{m}$ ) | Thickness (nm) | Resistivity ( $\Omega\text{-m}$ ) |
|---------------|-------------------------|-------------|-------------------------|----------------|-----------------------------------|
| 1             | 3.3                     | 5.95        | 972                     | 923            | $4.98 \times 10^{-7}$             |
| 2             | 5.2                     | 5.71        | 1002                    | 857            | $7.82 \times 10^{-7}$             |
| 3             | 4.0                     | 6.51        | 970                     | 1066           | $6.35 \times 10^{-7}$             |

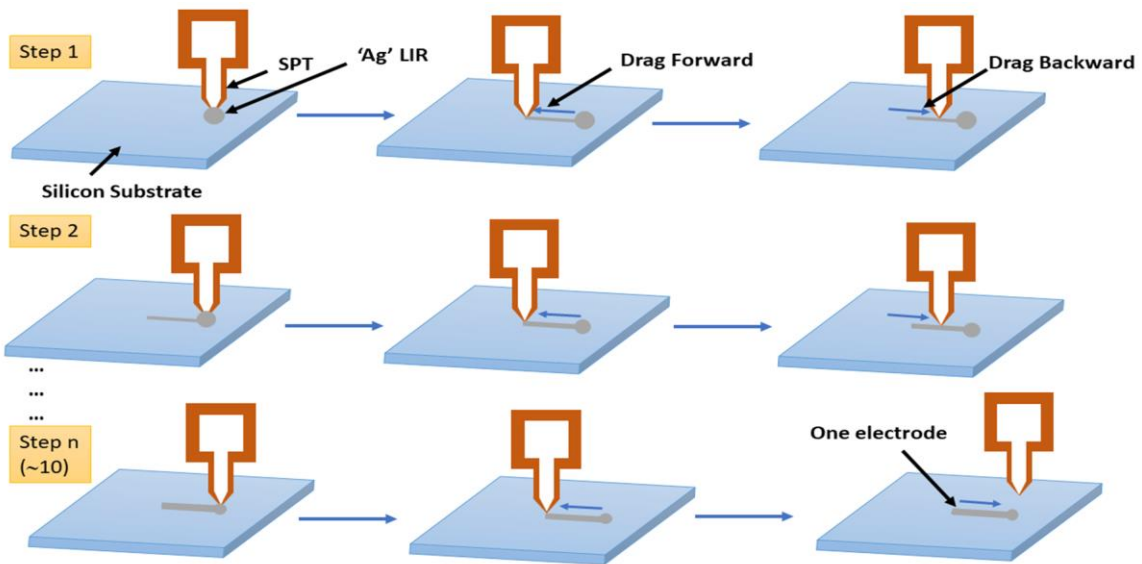

**Figure S5.** Schematic diagram of the device printing process. Step 2 onwards processes are repetitions of step 1.

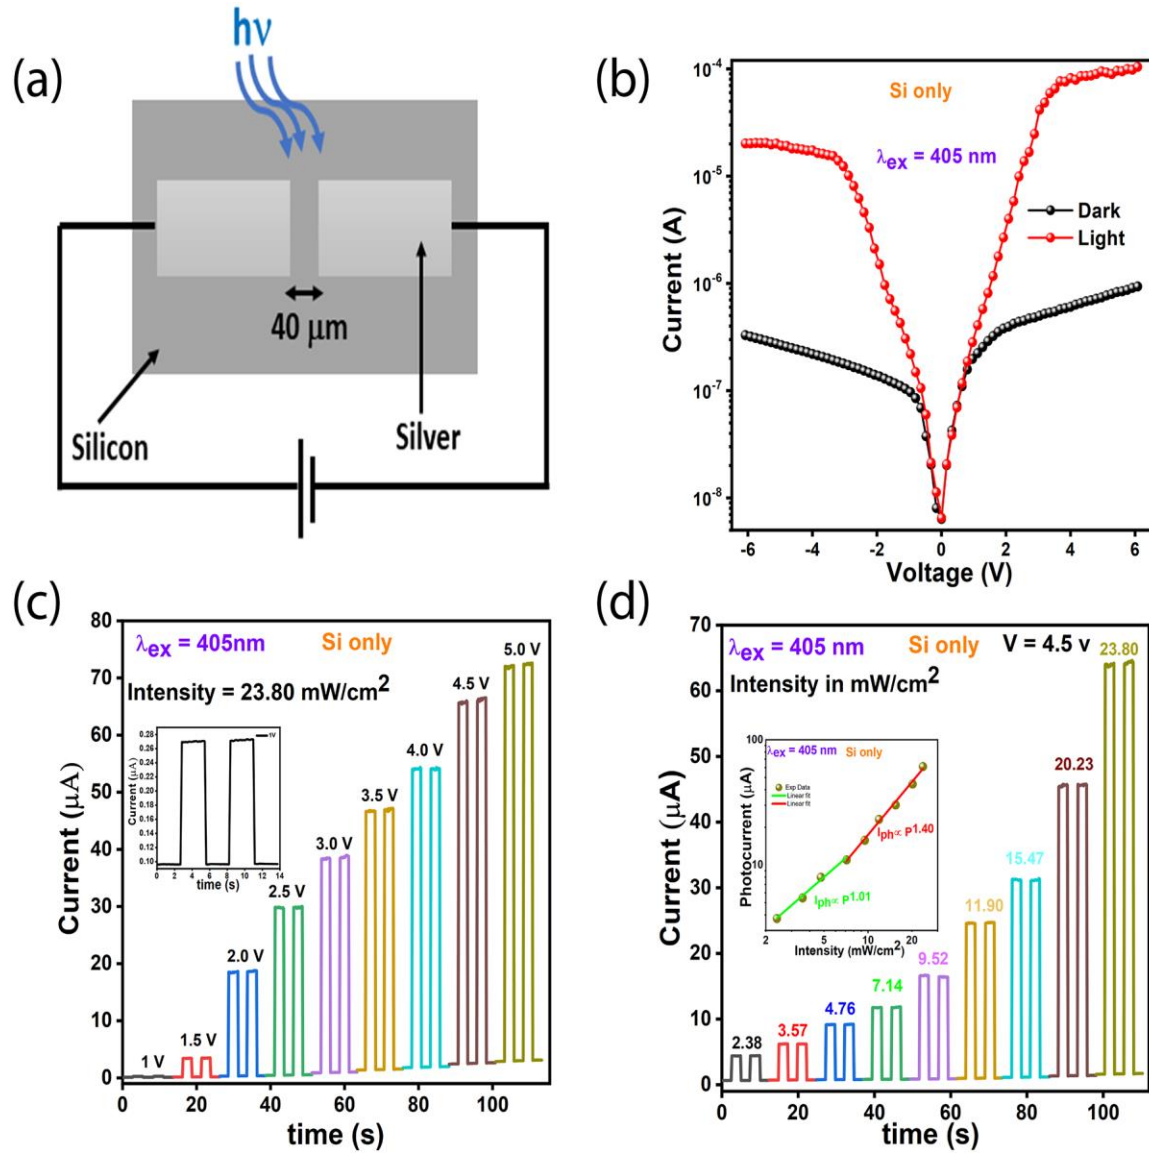

**Figure S6.** (a) Schematic of the bare Si PD with printed Ag electrodes. (b) I-V characteristics of the PD at dark and under  $405\ \text{nm}$  laser illumination. (c) Voltage-dependent I-t response of the Si PD. (d) Illumination power dependent I-t of the device. The inset shows a light intensity dependent photocurrent showing non-linear response of the device.

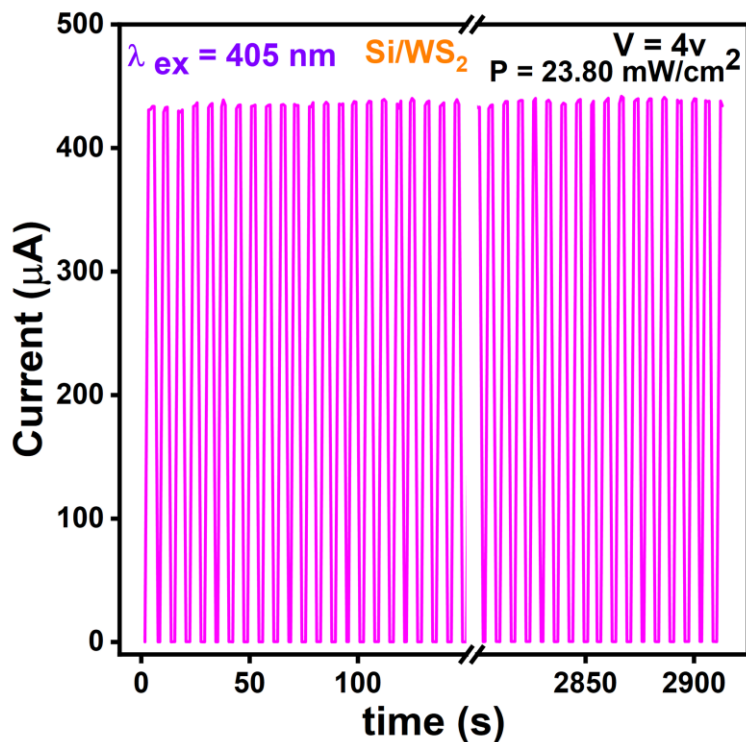

**Figure S7.** Stability of the printed Si/WS<sub>2</sub> photodetector under prolonged light (405 nm) illumination.

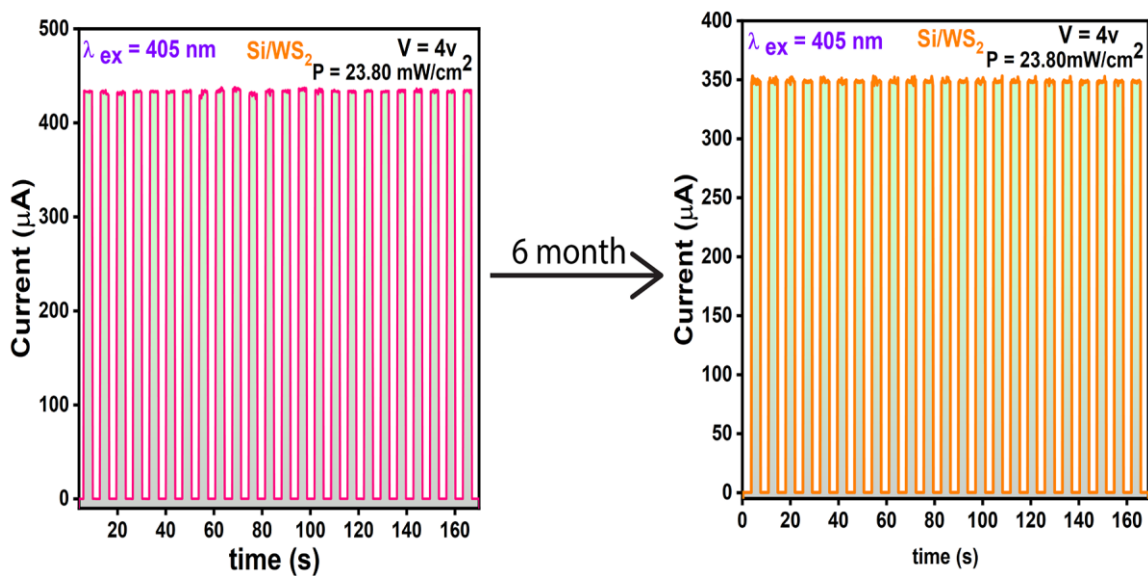

**Figure S8.** Storage stability of the printed Si/WS<sub>2</sub> photodetector after six months.



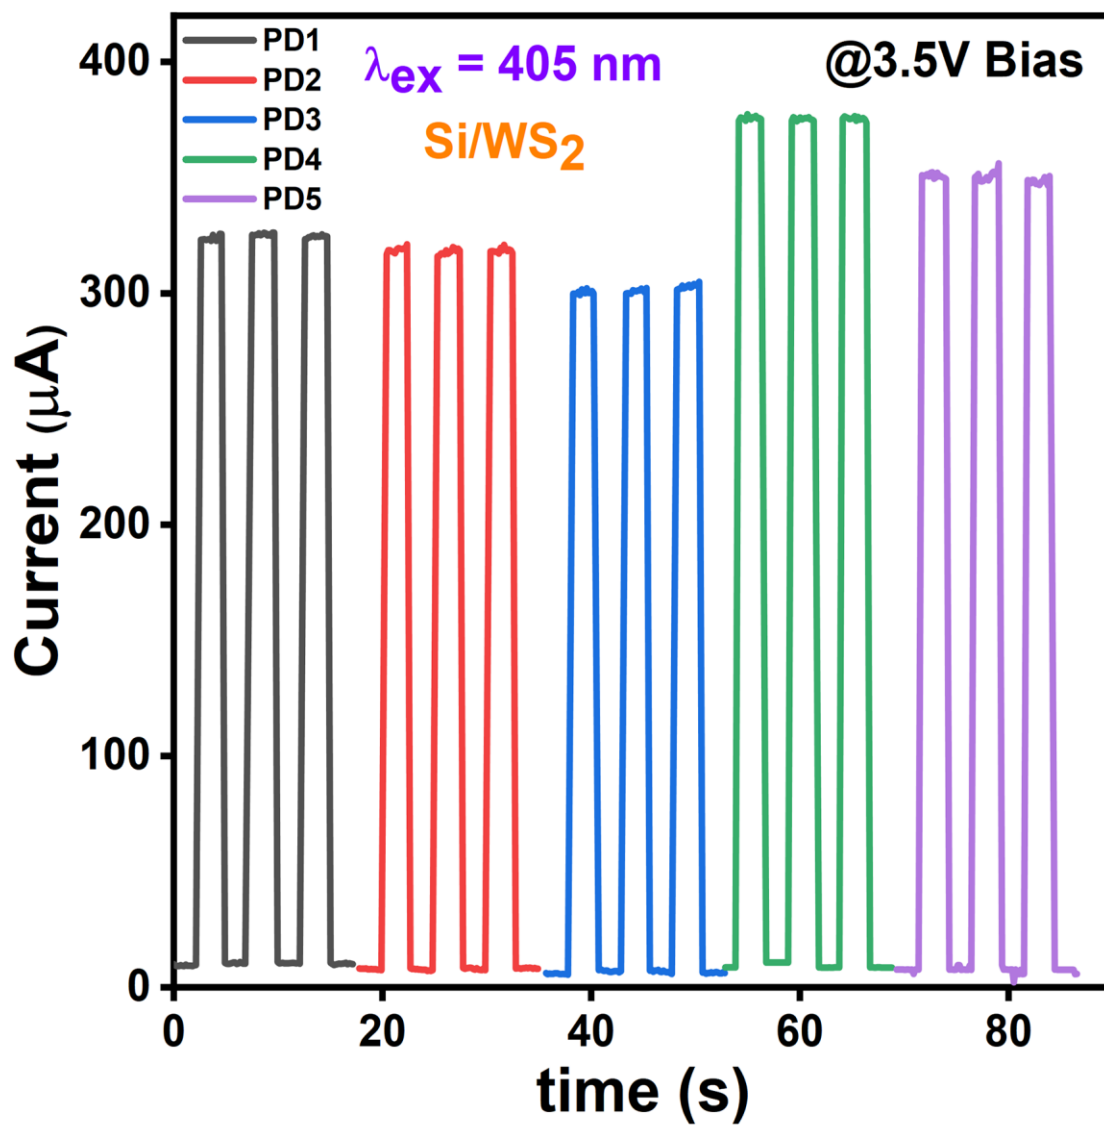

**Figure S9.** Reproducibility of the device fabrication and performance of the PDs. I-t data for five different printed Si/WS<sub>2</sub> PDs show nearly identical results.



**Table S2.** Comparison of the Si/WS<sub>2</sub> photodetector performance fabricated by different techniques.

| <b>Synthesis / Fabrication method</b>                 | <b>I<sub>on</sub> / I<sub>off</sub></b> | <b>Responsivity (A/W)</b> | <b>Specific Detectivity (Jones)</b> | <b>Response Time</b> | <b>Ref.</b>      |
|-------------------------------------------------------|-----------------------------------------|---------------------------|-------------------------------------|----------------------|------------------|
| Sputtering/ silver paste coat                         | 10 <sup>2</sup>                         | 5.70                      |                                     | 670 / 998 (μs)       | <sup>48</sup>    |
| Li-ion intercalation (dip coat) / Thermal evaporation | 10 <sup>3</sup>                         | 1.11                      | 5 × 10 <sup>11</sup>                | 42 / 72 (ms)         | <sup>49</sup>    |
| Thermal decomposition/ photolithography               | 10 <sup>6</sup>                         | 0.22                      | 1.5 × 10 <sup>12</sup>              | 16 / 29 (μs)         | <sup>50</sup>    |
| Sputtering / Au electrode                             | 1.2 × 10 <sup>3</sup>                   | 5.2                       | 4.8 × 10 <sup>12</sup>              | 14, <1 (ms)          | <sup>51</sup>    |
| Sputtering/thermal evaporation (Drop-cast)            | 227                                     | 186.6                     | 5.4 × 10 <sup>12</sup>              | 55.1/139.8 (μs)      | <sup>24</sup>    |
| Liquid phase exfoliation / Fully printed              | 5.2 × 10 <sup>3</sup>                   | 126                       | 9.24 × 10 <sup>12</sup>             | 7.8 / 9.5 (μs)       | <i>This work</i> |

**Table S3.** Comparison of TMD-based printed photodetector performance.

| Materials                              | Printing Technique                             | Responsivity (A/W)    | Specific Detectivity (Jones) | Response time  | Ref.          |
|----------------------------------------|------------------------------------------------|-----------------------|------------------------------|----------------|---------------|
| MoS <sub>2</sub> , graphene electrode  | Inkjet printing                                | 0.30                  | $3.6 \times 10^{10}$         | -              | <sup>36</sup> |
| MoS <sub>2</sub> , graphene electrode  | Inkjet printing                                | 0.05                  | $3.18 \times 10^9$           | ~ 150 (μs)     | <sup>37</sup> |
| MoS <sub>2</sub> , graphene electrode  | Aerosol Jet printing                           | 10 <sup>3</sup>       | $1.8 \times 10^7$            | ~ 2, <1 (ms)   | <sup>38</sup> |
| MoS <sub>2</sub> , Ti/ Au electrode    | Electrohydrodynamic-Jet Printing / Lithography | 3.78                  | -                            | -              | <sup>39</sup> |
| WS <sub>2</sub> / graphene electrode   | Inkjet/screen printing                         | $0.61 \times 10^{-3}$ | -                            | -              | <sup>40</sup> |
| Si /WS <sub>2</sub> , Silver electrode | Microcantilever-based printing                 | 126                   | $9.24 \times 10^{12}$        | 7.8 / 9.5 (μs) | This work     |

## REFERENCES

- (48) Lan, C.; Li, C.; Wang, S.; He, T.; Jiao, T.; Wei, D.; Jing, W.; Li, L.; Liu, Y. Zener Tunneling and Photoresponse of a WS<sub>2</sub>/Si van Der Waals Heterojunction. *ACS Appl. Mater. Interfaces* **2016**, *8* (28), 18375–18382. <https://doi.org/10.1021/acsami.6b05109>.
- (49) K. Chowdhury, R.; Maiti, R.; Ghorai, A.; Midya, A.; K. Ray, S. Novel Silicon Compatible P-WS<sub>2</sub> 2D/3D Heterojunction Devices Exhibiting Broadband Photoresponse and Superior Detectivity. *Nanoscale* **2016**, *8* (27), 13429–13436. <https://doi.org/10.1039/C6NR01642A>.
- (50) Wu, E.; Wu, D.; Jia, C.; Wang, Y.; Yuan, H.; Zeng, L.; Xu, T.; Shi, Z.; Tian, Y.; Li, X. In Situ Fabrication of 2D WS<sub>2</sub>/Si Type-II Heterojunction for Self-Powered Broadband Photodetector with Response up to Mid-Infrared. *ACS Photonics* **2019**, *6* (2), 565–572. <https://doi.org/10.1021/acsp Photonics.8b01675>.
- (51) Pal, S.; Mukherjee, S.; Jangir, R.; Nand, M.; Jana, D.; Mandal, S. K.; Bhunia, S.; Mukherjee, C.; Jha, S. N.; Ray, S. K. WS<sub>2</sub> Nanosheet/Si p–n Heterojunction Diodes for UV–Visible Broadband Photodetection. *ACS Appl. Nano Mater.* **2021**, *4* (3), 3241–3251. <https://doi.org/10.1021/acsanm.1c00421>.
